# Supplementary material
Source: PubMed Central journal article supplement (PMC9703152)
Supplement: NIHMS1685647-supplement-1.pdf [file NIHMS1685647-supplement-1.pdf]

## Journal of Hepatology CTAT methods

Tables for a “Complete, Transparent, Accurate and Timely account” (CTAT) are now mandatory for all revised submissions. The aim is to enhance the reproducibility of methods.

- Only include the parts relevant to your study
- Refer to the CTAT in the main text as ‘Supplementary CTAT Table’
- Do not add subheadings
- Add as many rows as needed to include all information
- Only include one item per row

**If the CTAT form is not relevant to your study, please outline the reasons why:**

N/A

### 1.1 Antibodies

| Name | Citation | Supplier | Cat no. | Clone no. |
|------|----------|----------|---------|-----------|
| N/A  |          |          |         |           |

### 1.2 Cell lines

| Name       | Citation       | Supplier                 | Cat no.         | Passage no. | Authentication test method        |
|------------|----------------|--------------------------|-----------------|-------------|-----------------------------------|
| HepG2.2.15 | RRID:CVCL_L855 | Dr. B. Korba             | N/A             | < 50        | Morphology, growth curve analysis |
| HepG2      | RRID:CVCL_0027 | ATCC                     | ATCC® HB-8065™  | <50         | Morphology, growth curve analysis |
| Huh7       | RRID:CVCL_0336 | Dr.T.Wakita              | N/A             | <50         | Morphology, growth curve analysis |
| MT-2       | RRID:CVCL_2631 | NIH AIDS Reagent Program | 237             | <50         | Morphology, growth curve analysis |
| MOLT-4     | RRID:CVCL_0013 | ATCC                     | ATCC® CRL-1582™ | <50         | Morphology, growth curve analysis |
| WiDr       | RRID:CVCL_2760 | JCRB                     | JCRB0224        | 15          | DNA Profile (STR)                 |

### 1.3 Organisms

| Name     | Citation                                                                                                                                                                     | Supplier             | Strain                           | Sex  | Age         | Overall number |
|----------|------------------------------------------------------------------------------------------------------------------------------------------------------------------------------|----------------------|----------------------------------|------|-------------|----------------|
| PXB-mice | Tateno C, Kawase Y, Tobita Y, et al. Generation of Novel Chimeric Mice with Humanized Livers by Using Hemizygous cDNA-uPA/SCID Mice. <i>PLoS One</i> . 2015;10(11):e0142145. | PhoenixBio Co., Ltd. | cDNA-uPA <sup>wild/+</sup> /SCID | male | 29-31 weeks | 34             |

### 1.4 Sequence based reagents

| Name | Sequence | Supplier |
|------|----------|----------|
|      |          |          |

## 1.5 Biological samples

| Description              | Source                              | Identifier |
|--------------------------|-------------------------------------|------------|
| PXB-cells                | PhoenixBio Co., Ltd.                | PPC-P96    |
| Human primary hepatocyte | SCR ScienCell Research Laboratories | 5200/9351  |

## 1.6 Deposited data

| Name of repository | Identifier | Link |
|--------------------|------------|------|
| N/A                |            |      |

## 1.7 Software

| Software name | Manufacturer               | Version          |
|---------------|----------------------------|------------------|
| Maestro       | Schrödinger, LLC, New York | version 10.7.015 |

## 1.8 Other (e.g. drugs, proteins, vectors etc.)

|                                                                                                                                                                                                 |                                                                                                                                                                                                 |                                                               |
|-------------------------------------------------------------------------------------------------------------------------------------------------------------------------------------------------|-------------------------------------------------------------------------------------------------------------------------------------------------------------------------------------------------|---------------------------------------------------------------|
| <b>E-CFCP:</b> (1 <i>S</i> ,3 <i>S</i> ,5 <i>S</i> , <i>E</i> )-3-(2-amino-6-oxo-1,6-dihydro-9 <i>H</i> -purin-9-yl)-2-(fluoromethylene)-5-hydroxy-1-(hydroxymethyl)cyclopentane-1-carbonitrile | <b>Z-CFCP:</b> (1 <i>S</i> ,3 <i>S</i> ,5 <i>S</i> , <i>Z</i> )-3-(2-amino-6-oxo-1,6-dihydro-9 <i>H</i> -purin-9-yl)-2-(fluoromethylene)-5-hydroxy-1-(hydroxymethyl)cyclopentane-1-carbonitrile | <b>CMCdG:</b> 4'-Cyano-methylenecarbocyclic-2'-deoxyguanosine |
| <b>ETV:</b> entecavir                                                                                                                                                                           | <b>TAF:</b> tenofovir alafenamide                                                                                                                                                               | <b>TDF:</b> tenofovir disoproxil fumarate                     |
| <b>3TC:</b> lamivudine                                                                                                                                                                          | <b>ddC :</b> 2',3'-Dideoxycytidine                                                                                                                                                              | <b>GLS4:</b> Morphothiadin                                    |
| <b>pHBV<sub>WT</sub><sup>C2</sup></b>                                                                                                                                                           | <b>pHBV<sub>ADV-R</sub><sup>A181T/N236T</sup></b>                                                                                                                                               | <b>pHBV<sub>ETV-R</sub><sup>L180M/S202G/M204V</sup></b>       |
| <b>HIV-1<sub>LAI</sub></b>                                                                                                                                                                      | <b>poly I:C</b>                                                                                                                                                                                 | <b>IFN-<math>\alpha</math> :</b> interferon- $\alpha$         |
| <b>IL-2:</b> interleukin-2                                                                                                                                                                      |                                                                                                                                                                                                 |                                                               |

## 1.9 Please provide the details of the corresponding methods author for the manuscript:

|                                                                                                                                                                                                                                                                                                                                                                                                                                                                             |
|-----------------------------------------------------------------------------------------------------------------------------------------------------------------------------------------------------------------------------------------------------------------------------------------------------------------------------------------------------------------------------------------------------------------------------------------------------------------------------|
| <p><b>Hiroaki Mitsuya</b></p> <p>1) Experimental Retrovirology Section<br/>HIV and AIDS Malignancy Branch<br/>National Cancer Institute, NIH, Bethesda, MD 20892, USA<br/>Phone: +1-240-858-3260<br/>Email: <a href="mailto:hiroaki.mitsuya2@nih.gov">hiroaki.mitsuya2@nih.gov</a></p> <p>2) Department of Refractory Viral Infections,<br/>National Center for Global Health &amp; Medicine Research Institute,<br/>1-21-1 Toyama, Shinjuku-ku, Tokyo, 162-8655, Japan</p> |
|-----------------------------------------------------------------------------------------------------------------------------------------------------------------------------------------------------------------------------------------------------------------------------------------------------------------------------------------------------------------------------------------------------------------------------------------------------------------------------|

Phone: +81-33-202-7181  
Fax: +81-33-202-7364  
Email: [hmitsuya@hosp.ncgm.go.jp](mailto:hmitsuya@hosp.ncgm.go.jp)

**2.0** Please confirm for randomised controlled trials all versions of the clinical protocol are included in the submission. These will be published online as supplementary information.

N/A
